# Supplementary material for: Multimodal optical characterisation of collagen photodegradation by femtosecond infrared laser ablation
Source: Royal Society of Chemistry journal article supplement (doi:10.1039/c4an01523a), 2014-01-01
Supplement: c4an01523a1.pdf [file c4an01523a1.pdf]

## † Electronic Supplementary Information (ESI)

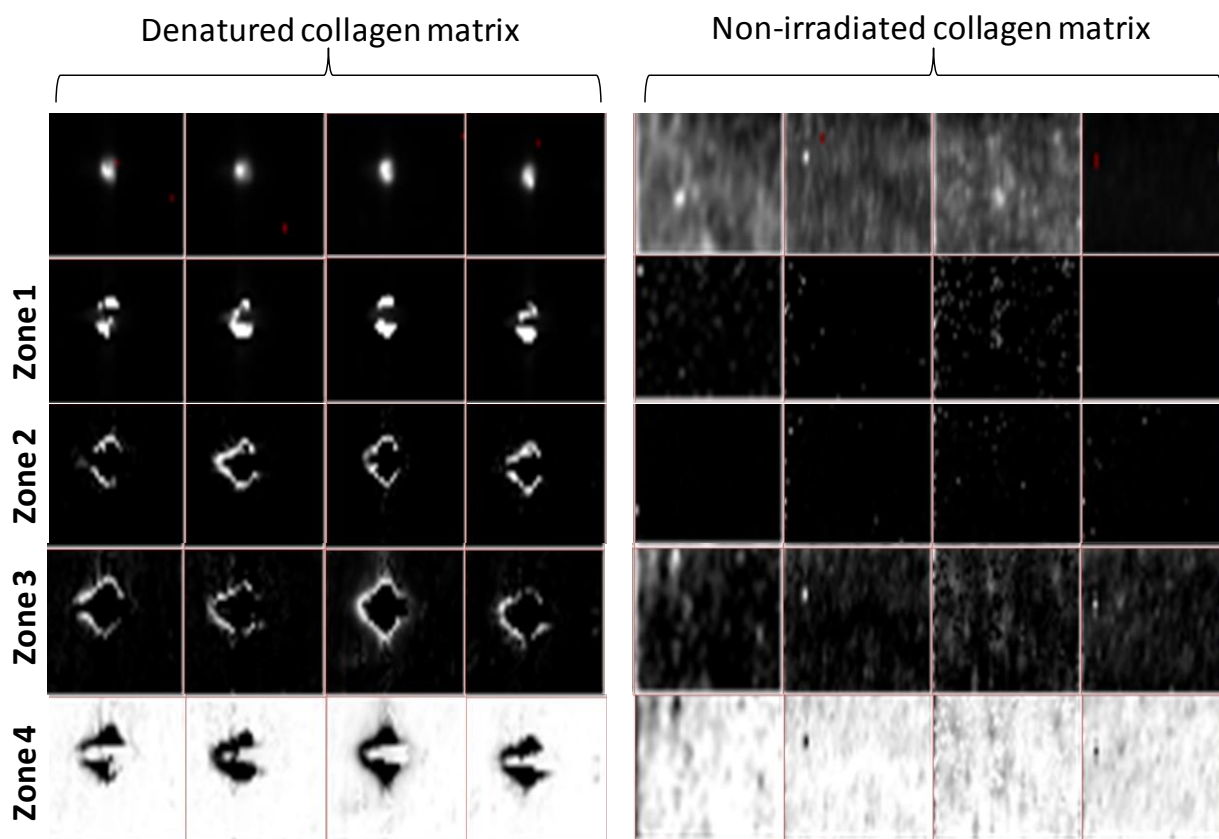

Raman cluster analysis - showing groups of dissimilar clusters identified. The cluster 1 represents depolymerised collagen (zone 1), cluster 2 attributes to the enhanced cross-linking zone (zone 2), cluster 3 corresponds to the reduced cross-linking zone (zone 3) and cluster 4 showing healthy collagen (zone 4)
